# Supplementary material for: Meditation and Yoga for Irritable Bowel Syndrome: A Randomized Clinical Trial
Source: PubMed Central journal article supplement (PMC9889201; doi:10.14309/ajg.0000000000002052), 2022-10-11
Supplement: acg-118-329-s001.pdf [file acg-118-329-s001.pdf]

# Meditation and Yoga for Irritable Bowel Syndrome (MY-IBS) Study

## WEEKLY PRACTICE LOG

Please **DOWNLOAD** this form on your computer and **SAVE** it after you fill it every day.

**Week #**

**Participant Id**

**Week Start Date**

Check the box for each practice you completed and record the total daily minutes of your practice. Skip the rows for the practices you have not yet learned.

| Yoga practices completed             | Day 1 | Day 2 | Day 3 | Day 4 | Day 5 | Day 6 | Day 7 | Week Total |
|--------------------------------------|-------|-------|-------|-------|-------|-------|-------|------------|
| Directional Movement of the Arms     |       |       |       |       |       |       |       |            |
| Neck Practices                       |       |       |       |       |       |       |       |            |
| Yoga Namaskar                        |       |       |       |       |       |       |       |            |
| Alternate Nostril Breathing          |       |       |       |       |       |       |       |            |
| Mantra Meditation                    |       |       |       |       |       |       |       |            |
| Breath Watching                      |       |       |       |       |       |       |       |            |
| Total daily minutes spent doing Yoga |       |       |       |       |       |       |       |            |

Click the **RESET** button to clear and enter values for a new week

If you have finished entering all the values for this week, please go to the next page.

The following 7 questions are **OPTIONAL** and can be completed **ONLY** after you have finished entering all your practices for this week.

These questions will help to record and monitor the severity of your IBS symptoms on a weekly basis. It is to be expected that your symptoms might vary over time, so please try and answer the questions based on how you currently feel.

**If you answer all of the questions, you will be able to see your IBS symptom severity score for this week**

1. Do you currently suffer from abdominal pain?      **YES**                      **NO**
  
2. If Yes, how severe is your abdominal pain?
 

|         |                 |              |        |             |
|---------|-----------------|--------------|--------|-------------|
| No pain | Not very severe | Quite severe | Severe | Very severe |
|---------|-----------------|--------------|--------|-------------|
  
3. Please enter the number of days that you get pain every **10** days -  
 (For example, if you enter 4, it means that you get pain 4 out of 10 days. If you get pain every day, enter 10).
  
4. Do you currently suffer from abdominal distension (bloating, swollen or tight stomach)?*[People who menstruate, please ignore distension related to your periods].*                      **YES**                      **NO**
  
5. If Yes, how severe is your abdominal distension/tightness?
 

|               |                 |              |        |             |
|---------------|-----------------|--------------|--------|-------------|
| No distension | Not very severe | Quite severe | Severe | Very severe |
|---------------|-----------------|--------------|--------|-------------|
  
6. How satisfied are you with your bowel movements?
 

|                |                 |         |                    |                   |
|----------------|-----------------|---------|--------------------|-------------------|
| Very satisfied | Quite satisfied | Neutral | Quite dissatisfied | Very dissatisfied |
|----------------|-----------------|---------|--------------------|-------------------|
  
7. How much is your IBS affecting or interfering with your life in general?
 

|            |          |          |             |            |
|------------|----------|----------|-------------|------------|
| Not at all | Not much | Somewhat | Quite a lot | Completely |
|------------|----------|----------|-------------|------------|

**Your IBS Severity Score**

**What your score means**  
**75-175: Mild**  
**175-300: Moderate**  
**>300: Severe**

*Please click on **SUBMIT** below to send us your weekly Practice log.*

To send us the paper form, please scan and email it to [vidya.rajagopalan@ucalgary.ca](mailto:vidya.rajagopalan@ucalgary.ca)
