# Supplementary material for: Meditation and Yoga for Irritable Bowel Syndrome: A Randomized Clinical Trial
Source: PubMed Central journal article supplement (PMC9889201; doi:10.14309/ajg.0000000000002052), 2022-10-11
Supplement: acg-118-329-s002.pdf [file acg-118-329-s002.pdf]

## RESOURCES FOR CONTROL PARTICIPANTS

Here are a few resources on IBS you may find helpful.

### **General Information on IBS:**

<https://cdhf.ca/digestive-disorders/irritable-bowel-syndrome-ibs/>  
<https://aboutibs.org/>

### **IBS Patient Support Group:**

<https://www.ibspatient.org/>

### **Physical Activity Information:**

<https://www.who.int/news-room/fact-sheets/detail/physical-activity>

We hope you found this information helpful.

Should have any questions about this study, please contact us.

Adrijana D'Silva  
Study Coordinator  
[adrijana.dsilva@ucalgary.ca](mailto:adrijana.dsilva@ucalgary.ca)
